1

2

3

4 **Reconstructing the transport cycle in the sugar porter**  
5 **superfamily using coevolution-powered machine learning**

6

7 Darko Mitrovic<sup>1</sup>, Sarah E. McComas<sup>1,2</sup>, Claudia Alleva<sup>1,2</sup>, Marta Bonaccorsi<sup>1,2</sup>, David  
8 Drew<sup>2,#</sup>, Lucie Delemotte<sup>1,#</sup>

9 <sup>1</sup>Department of Applied Physics, Science for Life Laboratory, KTH Royal Institute of  
10 Technology, Stockholm, Sweden. <sup>2</sup>Department of Biochemistry and Biophysics,  
11 Science for Life Laboratory, Stockholm University, SE-106 91 Stockholm, Sweden.

12

1 **Abstract**

2

3 **Sugar porters represent the largest group of secondary-active transporters. Some**  
4 **members, such as the glucose (GLUT) transporters, are well-known for their role**  
5 **in maintaining blood glucose homeostasis in mammals, with their expression**  
6 **upregulated in many types of cancers. Because only a few sugar porter structures**  
7 **have been determined, mechanistic models have been constructed by piecing**  
8 **together structural states of distantly-related proteins. Current GLUT transport**  
9 **models are predominantly descriptive, and oversimplified. Here, we have**  
10 **combined coevolution analysis and comparative modeling, to predict structures of**  
11 **the entire sugar porter superfamily in each state of the transport cycle. We have**  
12 **analysed the state-specific contacts inferred from coevolving residue pairs, and**  
13 **shown how this information can be used to rapidly generate free-energy**  
14 **landscapes consistent with experimental estimates, as illustrated here for the**  
15 **mammalian fructose transporter GLUT5. By comparing many different sugar**  
16 **porter models and scrutinizing their sequence, we have been able to define the**  
17 **molecular determinants of the transport cycle, which are conserved throughout**  
18 **the sugar porter superfamily. We have also been able to highlight differences**  
19 **leading to the emergence of proton-coupling, validating and extending the**  
20 **previously proposed latch mechanism. Our computational approach is**  
21 **transferable to any transporter, and to other protein families in general.**

22

## 1 **Introduction**

2 Due to the importance of glucose and other monosaccharides for cell metabolism<sup>1</sup>,  
3 sugar porters are the largest and widest-spread family of small molecule transporters  
4 across all Kingdoms of life<sup>2,3</sup>. In mammals, the sugar porters are referred to as glucose  
5 (GLUT) transporters belonging to the Solute Carrier Family 2A<sup>4-6</sup>. Human has 14  
6 different GLUT isoforms, and each isoform has a distinct pattern of tissue distribution,  
7 gene regulation, substrate preference and kinetic properties<sup>6-8</sup>. GLUT1, for example, is  
8 distributed in a wide range of tissues, including the blood–brain barrier, and is essential  
9 for glucose transport into the brain<sup>1,6</sup>, whereas GLUT4 is mostly localized in skeletal  
10 muscle and adipose tissue, and is the major insulin-stimulated glucose transporter<sup>8</sup>.  
11 GLUT5 is the only member specific to fructose and is the major route for its intestinal  
12 absorption<sup>9,10</sup>. In plants, fungi, bacteria and parasites the sugar porter family has  
13 likewise expanded into a large number of different isoforms, providing essential and  
14 niche roles in the uptake of D-glucose and other monosaccharides. Plants, for example,  
15 express specific sugar porter isoforms for seed, fruit and pollen production<sup>11</sup> and yeast  
16 have 20 different hexose transporters with various kinetics<sup>12</sup>, which are targeted for  
17 biofuel production<sup>13</sup>. Parasites, such as *Plasmodium Falciparum* rely on sugar transport  
18 to infect their host and reproduce<sup>14,15</sup>, resorting to a promiscuous sugar porter, which  
19 can take up a variety of sugars<sup>16</sup>. Understanding the molecular basis for sugar transport  
20 is thus a fundamental question in biology, with important medical and biotechnological  
21 applications.

22 Sugar porters belong to the Major Facilitator Superfamily (MFS)<sup>2,3</sup> and are defined by  
23 an N- and C-terminal bundle of 6 TMs, which are connected by a cytosolic loop that is  
24 made up of three to four intracellular helices (ICH)<sup>2,17</sup>. The sugar porters can be  
25 subclassified by a sequence motif<sup>18</sup>, which structures have shown corresponds to an  
26 intracellular salt-bridge network that selectively stabilizes the outward-facing state<sup>17,19-</sup>  
27 <sup>21</sup>. Constructing a transport cycle requires assembling five different conformational  
28 states along the transport cycle: outward-open, outward-occluded, occluded, inward-  
29 occluded and inward-open (Fig. 1A,B)<sup>2,17</sup>. Globally, sugar porters operate according to  
30 the rocker-switch alternating-access mechanism<sup>2,17</sup>. Although the two bundle are  
31 structurally similar, D-glucose is not coordinated evenly, but almost entirely by  
32 residues located in the C-terminal bundle<sup>16,22,23</sup>. As a consequence, half helices TM7b  
33 and TM10b in the C-terminal bundle are thought to undergo local rearrangements to  
34 control access to the sugar binding site from the outside and inside, respectively<sup>2,17,20,24</sup>.

1 Whilst the sugar porter family is structurally the best characterized out of all MFS  
2 transporters<sup>2</sup>, there is still not a single sugar porter that has structures determined in all  
3 of these different states. Indeed, some conformations, such as the occluded and inward-  
4 occluded states<sup>16,25,26</sup>, have only been experimentally resolved in one isoform. Due to  
5 the paucity of structural information, transport models are currently descriptive, lacking  
6 rigorous validation. Consequently, it is still unclear if the single snapshots represent  
7 physiologically relevant conformations along the transport cycle, and if unique  
8 structural features are transferable to more distantly-related members.

9 Despite low sequence identity, structures of distantly-related sugar porters show a high  
10 degree of structural conservation as compared to many other types of MFS  
11 transporters<sup>2,16</sup>. Using the 20 available experimental structures spread across all major  
12 conformations<sup>2</sup>, we hypothesized that we should be able to pinpoint co-evolving  
13 residues pairs specific to each state, and then use these contacts for structure prediction.  
14 Notably, we reasoned that this approach would be superior to either i) homology  
15 modeling, which is intrinsically biased towards the captured structure, regardless of  
16 whether the features of the template are actually transferable across isoforms or not, or  
17 ii) structures generated by coevolution only, which may settle on a conformational state  
18 that satisfies the contacts from each of the multiple states, yet fails to capture a  
19 physiological conformation.

20

21 Here, we present a novel approach for state-specific structure prediction. In essence,  
22 we have used experimental structures determined in each of the different conformations  
23 to train a neural network to identify state-specific contacts. After filtering these contacts  
24 using coevolution information, we have then used them to apply biases to Alphafold2  
25 models<sup>27</sup> and driven them towards the various conformational states along the  
26 functional cycle. Next, we have combined these contacts into collective variables to use  
27 in enhanced sampling molecular dynamics (MD) simulations<sup>28,29</sup>, and computed the  
28 free-energy landscape of the fructose transporter GLUT5<sup>21</sup>. Finally, with a set of  
29 conserved state-specific contacts defined, we were able to pinpoint both contacts that  
30 govern the conformational cycle across the sugar porter family, and a series of  
31 transporter-specific interactions that control conformational cycling of each of the sugar  
32 porter subfamilies. In particular, we concentrate on deciphering the molecular and  
33 evolutionary determinants of sugar-proton-coupled symport.

34

## 1 **Results**

2

### 3 *Inferring co-evolving conserved residue pairs across all sugar porters*

4 AlphaFold2 structural models of the various sugar porters are thought to collectively  
5 capture all major conformational states<sup>30</sup>. However, deterministic prediction of a given  
6 state is not possible. Therefore, as expected, principal component analysis (PCA) based  
7 on pair-wise interactions reveals that sugar porters cluster within their individual  
8 subfamilies rather than according to the conformational state that happens to be  
9 predicted by the structure-prediction method (Fig. 1C, D). To be able to rationally build  
10 models of individual SPs in each of the states in the transport cycle, we thus need to  
11 steer AlphaFold2 generated models, or experimentally captured structures, when  
12 applicable, into alternative states. We achieve this by using state-specific contacts  
13 derived from coevolution analysis.

14 To do so, we first generated a representative sequence alignment by aligning ~1000  
15 sequences from each of the evolutionarily-distant sugar porter relatives belonging to  
16 mammalian sugar transporters (GLUTs), the bacterial and parasitic transporters  
17 (*PfHT1*, *XyleE*), the plant sugar transporters (STPs), and the fungal hexose transporters  
18 (HXT), separately (Figure 1A). These sugar porter family members were selected  
19 because they are either part of a major evolutionary branch of the sugar porter family  
20 or are functionally distinct and structurally characterized (as is the case for *PfHT1* or  
21 *XyleE*). We then used the resulting multiple sequence alignments (MSA) as input for  
22 Direct Coupling Analysis (DCA) to generate coevolution maps<sup>31</sup>. The coevolution  
23 maps generated from separately aligned MSAs were subsequently combined into a  
24 global coevolution map, filtering out contacts that were predominantly species-specific  
25 (see Methods). As illustrated for the proton-coupled xylose transporter *XyleE* (Figure  
26 2A), there is an extensive overlap between the MSA-derived coevolution contact maps  
27 and experimental inward-facing structural contacts. Nevertheless, several coevolving  
28 pairs do not correspond to interactions found in the structure. Overall, we estimate that  
29 ~10% of the top 500 co-evolving pairs represent contacts not formed in available crystal  
30 structures, presumably representing contacts forming in other conformational states  
31 (see Methods).

32

1 *Extracting state-dependent coevolving residue pairs from experimental structures*

2 To determine which coevolving pairs, correspond to contacts that are formed or broken  
3 in the 20 structures of different functional states, we trained a convolutional neural  
4 network (CNN) to classify the main five conformational states using as input contact  
5 maps from experimentally determined structures filtered by coevolution scores (Figure  
6 2B). The CNN architecture was designed to avoid redundancy of contacts between  
7 neighboring residue while allowing residue pairs to be in contact in several functional  
8 states (Methods, Figure 2B). Layer-wise relevance backpropagation (LRP) was then  
9 performed<sup>32</sup> on all five output classes separately, leading to the assignment of  
10 encouraged and discouraged contacts for each conformation (Figure 2C).

11 Interestingly, encouraged and discouraged contacts were not confined to inter-bundle  
12 contacts and are instead spread throughout the entire structure (Table S1). They also  
13 displayed strong state-dependency (Figure 3). Because of the low number of  
14 experimental structures available, training of the neural network carried a substantial  
15 risk of overfitting. We thus sought to validate the results by making sure that the state-  
16 specific contacts identified were indeed in the expected regions. Starting from the  
17 outward-facing conformation, we observe the expected encouraged contacts of inter-  
18 bundle salt-bridges formed between TM3-TM10b and TM5-TM8 helices. In contrast,  
19 we observe a strong signal for the discouraged contacts between TM1 and the  
20 extracellular gate TM7b, which are known to come together during rocker-switch  
21 transition into the inward-facing states<sup>2,21</sup>. In the occluded structure of *PfHT1*<sup>16</sup>, the  
22 extracellular gate TM7b was had moved fully inwards and transition into a broken helix  
23 at the point closest to TM1. Furthermore, mutations in TM1 were found to be just as  
24 critical for transport as those in TM7b<sup>16</sup>, indicating that TM1 and TM7b interactions  
25 might be important in driving formation of the occluded state. Indeed, we observe a  
26 robust signal for encouraged contacts between TM1 and TM7b, which is present as  
27 early as the occluded state, confirming that TM7b and the interactions with TM1 are  
28 co-evolving to enable attainment of the occluded conformation. As expected for an  
29 intermediate state, the occluded state has the maximal number of encouraged contacts.  
30 One additional set of encouraged contacts in the occluded state are located between the  
31 intracellular gating helix TM10b and TM4, which are required to drive formation of the  
32 occluded state from the inward-facing conformation<sup>2,25</sup>.

1 Interestingly, we observe the formation of less well-known inter-bundle contacts  
2 between TM1 and TM5, and between TM3 and TM6 when transitioning from an  
3 outward-open to an outward-occluded state, possibly modulating the conformational  
4 change of TM1. In transition between outward-facing and inward-facing states,  
5 additional contacts are also seen between TM3 and TM11, both at the extracellular  
6 region, in which case they are encouraged in the inward-facing states, and at the  
7 intracellular region, in which case they are encouraged in the outward-facing ones.  
8 These previously unreported contacts appear particularly important for transporter  
9 function as they are at the basis of the rocker switch motion passing through the  
10 occluded state. Taken together, the state-specific coevolution analysis is able to  
11 replicate the main structural transitions expected from comparing individual static  
12 structures, as well uncovering new contacts to be evaluated (Table S2).

13

#### 14 *Generating sugar porter structures for each major conformation*

15 To expand the available structural information for sugar porters, AlphaFold2 models  
16 were driven into all five conformational states in RosettaMP<sup>33</sup> using the derived  
17 encouraged and discouraged state-dependent contacts as attractive and repulsive biases,  
18 respectively (Figure 2C, Methods). A straightforward assessment of the quality of the  
19 models obtained was difficult to perform, however, as few experimental structures are  
20 available. Nevertheless, for an overall approximation, we calculated the C $\alpha$  root mean  
21 squared deviation (RMSD) to the phylogenetically closest available experimental  
22 structure. As shown in Figure 4, the mean RMSD difference has an acceptable value of  
23  $\sim 2.5$  Å, with the RMSD distribution spanning a 95% confidence interval of 1.5 to 3.2  
24 Å. In addition, to evaluate the stability of these models, 10 ns molecular dynamics  
25 simulations of these models embedded in a model membrane bilayer were then  
26 performed, which further relaxed the structures, bringing their overall RMSD to the  
27 closest homolog to  $\sim 2.1$  Å with the RMSD distribution spanning a 95% confidence  
28 interval of 1.1 to 2.7 Å. The RosettaMP modeling pipeline thus seems to bring the  
29 models close to their local free energy minimum, but relaxation by MD simulations  
30 further improves the quality of the models by relaxing them even more. To evaluate the  
31 cause of the RMSD reduction, we compared the GLUT5 outward-open state model  
32 before and after MD relaxation to the crystal structure of the same transporter solved in  
33 the same state (PDB ID 4YBQ), which showed that the model quality was improved

1 from a 2.15 Å C $\alpha$  RMSD to a 1.49 Å C $\alpha$  RMSD, mainly via the relaxation of TM1  
2 (Figure 4C). It seems that, in this case, flexible helices require an explicit solvent model  
3 to attain a more physiological conformation.

4 As a next assessment of quality, we re-analyzed the STP10 model against the inward-  
5 open STP10 crystal structure (PDB ID 7AAR)<sup>34</sup>, whose structure was not present in our  
6 initial training set as its structure was released after training of our model. The inward-  
7 open state model of STP10 previously had a calculated C $\alpha$  RMSD of 4.3 Å away from  
8 its closest homologue with known structure, Xyle (PDB 4QIQ)<sup>25</sup>. However, the actual  
9 C $\alpha$  RMSD to the experimental STP10 inward-facing structure difference is only 2.2 Å,  
10 which was further reduced to 1.8 Å after MD simulations. Inspection of the STP10  
11 structure reveals a unique helical kink in TM10, which is not present in Xyle (Figure  
12 4B). An additional structure for inward-open GLUT4<sup>35</sup> was further determined after  
13 our initial model training was finalized. Our inward-open GLUT4 model has a RMSD  
14 of 2.3 Å and 1.8 Å before and after MD relaxation, respectively. Reassuringly, our  
15 method is thus able to model new structural features absent from the training set.  
16 Indeed, the C $\alpha$  RMSD estimated for HXT and STP members, as well as for models of  
17 the inward occluded states, which have fewer structures available to properly assess  
18 their accuracy, is generally higher (Figure 4A). Overall, we conclude that the generated  
19 sugar porter models are of sufficient quality for linking conformational states of sugar  
20 porters.

21

## 22 *A free-energy landscape for the fructose transporter GLUT5*

23 Characterizing robust free energy landscapes of conformational cycles of sugar  
24 transporters will enable us to better understand the mechanistic basis for sugar transport.  
25 Although free energy landscapes for GLUT transporters have been reported  
26 previously<sup>36-39</sup>, these were generated from a few structures only, and lacked the most  
27 recent structure in the occluded conformation<sup>2,16</sup>. Indeed, as co-evolution analysis  
28 confirms, the occluded state is an intermediate that has a number of important and  
29 specific co-evolved pairs that are critical for linking the outward and inward-facing  
30 conformations. In addition, the methods used to generate these landscapes did not  
31 consider whether structural features captured in specific structures were transferable to  
32 other family members. Here, we decided to generate a free energy landscape for the



1 fructose transporter GLUT5 using family-wide information in the form of coevolving  
2 contacts. We chose GLUT5 because it is the only transporter with experimental  
3 structures in both fully outward- and inward-facing conformations<sup>21</sup> and because our  
4 recently determined free energy landscape using a more traditional enhanced sampling  
5 method can serve as a comparison<sup>40</sup>.

6 The most efficient enhanced sampling techniques require the choice of a low-  
7 dimensional collective variable (CVs) set that encompass all degrees of freedom  
8 implicated in a conformational transition<sup>28,41</sup>. Given that state-dependent contacts  
9 constitute the driving force for a conformational transition, CVs based on those are well  
10 suited to distinguish conformational states and to enhance transitions between them.  
11 We thus trained a support vector machine (SVM) to distinguish the modelled structures  
12 of adjacent states (Figure S2) and extracted therefrom top coevolving contacts, as  
13 inferred from their high SVM coefficients. We then designed state-specific CVs as  
14 weighted sums of distances between top state-specific coevolving pairs, using as  
15 weights the SVM coefficients (See Methods). Finally, we ran accelerated weighted  
16 histogram (AWH), an efficient enhanced sampling method natively available in  
17 GROMACS, using these CVs as input. Accumulating 250-650 ns of MD simulations  
18 enabled an extensive sampling of the conformational space and the estimation of the  
19 corresponding free energy landscapes (Figure 5A-C) with satisfactory accuracy (Figure  
20 S1). Extracting the free energy along the minimum free energy path linking adjacent  
21 states made it possible to estimate a continuous 1d landscape that follows the minimum  
22 free energy path linking the outward-facing and the inward-facing states via the three  
23 occluded intermediates (Figure 5D, see Methods).

24 In the absence of substrate, the most favorable conformation for GLUT5 is the outward-  
25 facing state, which is consistent with biochemical analysis and the salt-bridge network  
26 on the intracellular side stabilizing this state<sup>20,21,42</sup>. The outward-open and outward-  
27 occluded states appear to be of comparable free energies, and the barriers between the  
28 outward-open and outward-occluded states are fairly low at 4 to 8 kJ/mol, respectively  
29 (Figure 5D). This observation is consistent with the fact that the structure of GLUT3  
30 has been determined in both outward-open and outward-occluded states, even in the  
31 presence of a bound maltose<sup>23</sup>. The largest energetic barrier of ~34 kJ/mol is located  
32 between the outward occluded and the inward-occluded state (Figure 5D). This barrier,  
33 presumably arises in part from the breakage of the strictly-conserved salt-bridge

1 network, and is consistent with the activation barrier of 10 kcal/mol as estimated by  
2 GLUT1 kinetics (43 kJ/mol)<sup>43,44</sup>(Figure 6E). Notably, the relaxed GLUT5 occluded  
3 state does not fall on the largest energetic barrier corresponding to the transition state  
4 (Figure 5). However, in the presence of a substrate sugar, GLUT5 passes through a  
5 transition state that closely matches the occluded state of *PfHT1*<sup>40</sup>. Our analysis  
6 indicates that coevolution-driven MD simulations are detecting an energetic minimum  
7 for an occluded state prior to the transition state which has not been experimentally  
8 observed (Figure S3). It is possible that the co-evolution analysis is detecting a pre-  
9 transition state, which is likely to be lowly populated in the presence of a substrate  
10 sugar. Taken together, we conclude that using evolutionary-based collective variables  
11 enables us to obtain sugar porter conformational free energy landscapes using AWH  
12 using simulations of the order of hundreds of nanoseconds. This represents an increase  
13 in performance by at least an order of magnitude compared to all of previous  
14 attempts<sup>38,45,46</sup>.

15

#### 16 *Family-wide state-dependent interactions*

17 Having validated that the top co-evolving pairs can be combined into collective  
18 variables able to connect the different conformational states and describe the energetics  
19 of transitions between them appropriately, we scrutinize the interactions that went into  
20 the construction of these CVs by projecting them onto the models of GLUT5 states  
21 (Figure 6). Notably, these interactions are more robustly defined than in the previous  
22 analysis shown in Figure 3, since those were based on the analysis of a reduced set of  
23 experimentally resolved structures. In addition, we track the functional diversity across  
24 the SP family by extracting the types of residue interactions found at these sites (Figure  
25 6).

26 Starting from the outward-open state, as expected, salt-bridge forming residues appear  
27 to stabilize the outward-facing conformations, a network that is maintained through to  
28 the occluded state (Figure 6A). In addition, the residue Ser306 located at the back of  
29 TM7b has co-evolved to form an interaction to Gln366 interaction in TM9, an  
30 interaction seen as Thr/Arg or Lys in the STP members and as between small and/or  
31 polar residues in the rest of the superfamily (Figure 6B).

1 The outward-occluded state is characterized by a bend in the TM7b helix, which  
2 occludes sugar exit<sup>2,47</sup>. The contact analysis shows that this state appears to be stabilized  
3 by co-evolving pairs between Tyr297 in TM7b and Asn325 and His387 in TM10a,  
4 which are peripheral to the sugar binding-site and could therefore be connected to sugar  
5 binding (Figure 6C). This interaction remains formed through to the inward occluded  
6 open state. In most other GLUT members and in the HXT proteins, Tyr297 and His387  
7 are replaced by Phe residues that are expected to interact with TM10a residues via  
8 hydrophobic or pi-pi interactions.

9 In the occluded state, TM7b transitions from a bent to broken helix, which occludes the  
10 sugar-binding site and moves TM7b closer to TM1. Interestingly, Asn40 of TM1 forms  
11 a hydrogen bond with the backbone residues at the break-point in TM7b, an interaction  
12 that remains formed through to the inward open states (Figure 6D). The Asn40 is  
13 conserved in *PfHT1* and mutation to alanine was shown to severely impair transport<sup>16</sup>.  
14 In most other family members, a hydrogen bond is made possible by the presence of a  
15 small polar residue in TM1, highlighting that stabilized TM7b closure is generally  
16 connected to interactions in TM1 as early as in the occluded state.

17 In addition to the most outward-facing salt bridge network (Figure 6A) breaking,  
18 rearrangements of TM10a helix and formation of the Tyr374 (TM10)-Thr318 (TM8)  
19 hydrogen bond characterizes entry into the inward facing states (Figure 6F). These  
20 positions often feature residue pairs capable of interaction either via hydrophobic  
21 interactions or H-bonding (Leu/Val-Ala in STPs, Asn/Tyr-Thr/Ser in the rest of the  
22 family). The formation of this contact in the inward occluded state is critical  
23 determinant for the rocker switch motion, as the resulting rearrangement of TM10a  
24 promotes the tilting of the peripheral helices, which ultimately rocks the helical bundles  
25 into an inward facing state.

26 For the intracellular gate to open, the residual Glu401-Arg159 salt bridge (Figure 6E)  
27 must completely break. Inspection of the distribution of the minimum distance between  
28 Glu401-Arg159 contact across reveals that it increases from an average of 1.4Å in the  
29 occluded state, to 3.4Å in the inward occluded state. The weakening of Glu401-Arg159  
30 presumably contributes to releasing TM10b. Entry into the inward-open state,  
31 stabilizing the tilted TM10b, features the full breakage of the Glu401-Arg159  
32 interaction, and Glu401 forming a salt bridge with a different partner, namely Arg341

1 (Figure 6G). The rotation of TM10b shifts the occluding Leu397 residue away from  
2 intracellular pathway to the sugar binding site, opening the intracellular gate fully. This  
3 state is also stabilized by additional strictly conserved hydrophobic contacts in the  
4 TM10-TM7 interface (positions 397-400 in GLUT5, which rearrange from an  
5 interaction with TM4 in the outward-facing and occluded state) (Figure 6G and S5).

6

### 7 *Coevolving residues support proton-coupling in sugar porters*

8 Having characterized the aspects of the sugar porter transport cycle that are likely  
9 conserved across the family, we turn to family-specific features, with a focus on the  
10 differences between passive and proton-coupled transporters, such as XyleE. The current  
11 working model is that an aspartic acid residue in TM1 (Asp27 in XyleE) is allosterically  
12 coupled to the sugar transport, but does not participate directly in sugar binding<sup>2,36,48,49</sup>.  
13 Indeed, the aspartic acid to asparagine mutant has the same sugar-binding affinity as  
14 wildtype<sup>50</sup>. Rather, it is thought that the protonation of the TM1 aspartic acid is required  
15 for transport as it breaks the outward-facing-specific salt-bridge interaction to an  
16 arginine residue Arg133 on TM4. Based on the occluded *PfHT1* structure<sup>2</sup>, highlighting  
17 the coupling between TM1 and TM7b, a latch mechanism for proton-coupling was  
18 proposed<sup>2</sup>. Simplistically, breakage of the Asp27-Arg133 salt-bridge enables TM1 to  
19 come closer to TM7b and TM7b only comes close enough to TM1 when sugar is  
20 present. Formation of the occluded state is catalyzed by sugar binding, but in proton  
21 coupled transporters, this is only enabled by the release of the latch (Figure 7A and S4).

22 The co-evolution analysis is consistent with TM1 and TM7 interactions driving  
23 formation of the occluded state. More specifically, we indeed see that the equivalent  
24 TM1 Asp and TM4 Arg salt-bridge is broken in occluded states of all known proton-  
25 coupled symporters, such as STP10. The details of the conformational rearrangement  
26 differ, however. After breaking of the latch, in the occluded state of XyleE, Arg133  
27 forms a salt bridge with the neighboring TM6 Glu206 residue (Figure 7A). In STP10,  
28 on the other hand, Glu206 is replaced by an alanine, and R133 rearranges by adopting  
29 a different rotameric state facing towards TM11, where it appears to be stabilized by an  
30 interaction with the phospholipid headgroups (Figure 7B and S4).

31 Most GLUTs are thought to be passive transporters and do not possess an acidic residue  
32 at position 27, consistent with its purported role as proton carrier (Figure 7D).

1 Intriguingly, however HXTs, which are generally not proton-coupled, do carry an  
2 acidic residue in this position. Our analysis reveals that this is explained by the fact that  
3 these transporters contain a latch interaction that is maintained throughout the  
4 conformational cycle thanks to a large-scale pivot of the first helical bundle (Figure 7C  
5 and S4). This conformational change unique to HXTs is enabled by helix breaking  
6 residues at position 202 (Pro/Gly), which are replaced by mostly hydrophobic residues  
7 in the rest of the family (Figure 7D). GLUT2, a passive transporter that nevertheless  
8 possesses an acidic residue at position 27, has a Serine in position 205 which interacts  
9 with D27, which appears to help the salt bridge remain formed in the occluded state  
10 (Figure S4D).

11

## 12 **Discussion**

13 AlphaFold2 has made it possible to produce high-quality models of structures associated  
14 with any amino acid sequence<sup>27</sup>. Nevertheless, these structures represent an arbitrary  
15 conformational state, and do not capture the conformational heterogeneity that enables  
16 protein function. Modifying the MSA depth enables to make models of alternate states,  
17 though in a non-deterministic manner<sup>30</sup>. In this work, we have used i. AlphaFold  
18 models, ii. coevolution analysis encoded by family-wide multiple sequence alignments  
19 and iii. state-specific contacts extracted from the ~20 structures to guide enhanced MD  
20 simulations. Our work goes beyond the analysis of static structures and enables the  
21 separation of state-specific and transporter-specific features, thus firmly establishing  
22 the family-wide determinants of the conformational cycle as well as establishing  
23 specificities of GLUT5 and of proton-coupled sugar transporters. By introducing  
24 coevolution as a measure of predicted interaction, we are able to develop models that  
25 go beyond the comparison of structures only. We also minimize information that may  
26 be lost during dimensionality reduction, as demonstrated by our validation on newly  
27 reported structures.

28 Using state-dependent coevolution-based contacts, we show that we can create a low-  
29 dimensional projection that describes the transition between adjacent states. When  
30 derived into a set of collective variables used in enhanced sampling molecular dynamics  
31 simulations, we can construct weighted conformational ensembles, or in other words  
32 free energy landscapes of the process. Comparing our convergence times (to less than

1 0.01 kJ/mol within 250-650ns per walker and system) to previous works on similar  
2 systems<sup>38,45,46</sup> and given the agreement between the activation barrier estimate from  
3 kinetic measurements<sup>43,44</sup> we conclude that the introduction of coevolution data is a  
4 powerful approach in obtaining accurate free-energy landscapes efficiently.

5 The conformational ensembles reveal an overall functional cycle that is largely  
6 consistent with the evaluation of experimentally resolved structures, yet also provides  
7 details that were previously unknown. Across the larger MFS family of transporters,  
8 cavity-closing contacts are predominantly formed between TM1-2 and TM7-8 on the  
9 outside and between TM4-5 and TM10-11 on the inside<sup>2,17</sup>. However, the sugar porters,  
10 as exemplified by GLUT transporters, coordinate the sugars very asymmetrically with  
11 only a single residue in the N-terminal bundle coordinating the sugar. As such, local  
12 rearrangements during the transport cycle are assumed to be primarily established by  
13 local changes in TM7b and TM10b half-helices, which coordinate the sugar in the C-  
14 terminal bundle. Although sugar porters are made up two structurally similar bundles,  
15 the asymmetrical rearrangements are more akin to the conformational changes  
16 described by rocking-bundle proteins<sup>2,17</sup>, which are made up from structurally distinct  
17 bundles. Consistently, co-evolution analysis is able to detect the importance of the  
18 substrate gating regions for driving conformational changes. In particular, the co-  
19 evolution analysis shows that TM7b and its interaction with TM1 have evolved to come  
20 together already in the occluded state, *i.e.*, rather than only interacting in the inward-  
21 facing conformatios. This conclusion is in agreement with the occluded structure seen  
22 for PfHT1<sup>16</sup>, wherein TM7b had moved completely inwards to break over the sugar-  
23 binding site.

24 The requirement for TM1 to interact with TM7b in formation of the occluded state  
25 further explains how sugar porters can evolve to be proton-coupled, even if the proton-  
26 accepting residue itself does not directly coordinate the sugar, *i.e.*, unlike in other sugar  
27 transporters, such as LacY. Simplistically, an aspartic acid residue in TM1 forms a salt-  
28 bridge with an arginine residue in TM4, restricting its movement. Protonation of the  
29 aspartic acid residue removes this constraint and TM1 can come closer to TM7b, which  
30 itself is stabilized inwards when it binds a substrate sugar. Interestingly, an acidic  
31 residue in TM6 (Asp206, Xyle numbering) is further required to provide a favorable  
32 alternative conformation for the unpaired arginine. In the passive GLUT transporter  
33 GLUT2 and the yeast hexose transporters, for example, this additional acidic residue is

1 missing and the salt-bridge is still retained due to the assistance of a nearby serine  
2 residue (Ser205, XylE numbering). Nevertheless, STP members are proton-coupled and  
3 yet they do not possess an additional acidic residue in TM6. Rather, the arginine residue  
4 is able to snorkel to the membrane interface in the unpaired state. Notably, although  
5 TM7b and TM1 are important, they are part of a larger interaction network that also  
6 includes, for example, how TM7b interacts with TM8 in the outward-open state.

7

8 Consistent with the orchestrating role of TM7b in substrate translocation, the co-  
9 evolved interaction with TM1 is retained across the entire second half of the transport  
10 cycle. In contrast, the inward-facing gating helix TM10b is likely to have a more  
11 passive role and a co-evolved interaction with TM4 is only formed in the occluded state.  
12 Nevertheless, TM10b dynamics are likely to be important and its possible that TM10b  
13 movement is facilitated by the stabilization of TM10a with TM8 on the extracellular  
14 side (Figure 6F). The bottom of TM10a harbors a strictly-conserved acidic residue,  
15 which is part of the intracellular salt-bridge network. The contact maps initially  
16 generated for all sugar porters indicated mostly discouraged contacts between TM4 and  
17 TM10b residues in the inward-occluded state (bundle 5 contact in Figure 3). In addition,  
18 the GLUT5 models show that whilst most contacts are indeed broken, there is still an  
19 encouraged contact between TM4 and TM10b residues in the inward-occluded state  
20 (Figure 6F, S5B). It thus appears that, at least in GLUT5, only one of the salt-bridge  
21 pairs are fully broken between the occluded to inward-occluded states. Such a result is  
22 intriguing, and implies that even the rocker-switch bundle movement might utilize  
23 asymmetric rearrangements.

24 Lastly, GLUT transporters are shown as textbook examples of how small molecule  
25 transporters are functional equivalents to enzymes<sup>2</sup>. Key to understanding catalysis is  
26 to understand how the transition state is formed during substrate translocation. The  
27 transition state, however, is only transiently occupied and therefore difficult to  
28 experimentally capture. Nevertheless, the parasite transporter *PfHT1* has an unusually  
29 very polar TM7b gate, which has made it possible to capture an occluded state with  
30 sugar present<sup>16,26</sup> i.e., notably this state is unlikely to represent a transition state for  
31 *PfHT1*. Nonetheless, out of the models we built, *PfHT1* has highest number of state-  
32 specific contacts in both gates. We speculate that the *PfHT1* could represent a pre-

1 transition state (Figure 5), with further dynamics between the bundles required to access  
2 the transition state. In summary, although many questions remain unanswered, our  
3 novel approach provides a rational framework for understanding how sugar porters  
4 function at the molecular level, and provides the information to re-engineer sugar  
5 porters with different characteristics, which might be otherwise inaccessible by  
6 traditional forward-evolution approaches. At a conceptual level, our work highlights  
7 how even the most simplistic type of transporters have evolved fine-tuned and intricate  
8 interactions to achieve substrate translocation.

9

## 10 **Methods**

### 11 **Coevolution analysis**

12 To construct the sequence alignment at the basis of coevolution analysis, a  
13 representative sequence from each member of the sugar transporter family was taken  
14 as a seed for a sequence search against the Uniref90 database<sup>51</sup> using PSIBLAST<sup>52</sup>. In  
15 this way, a sufficient number of diverse sequences was consistently found around each  
16 member ( $M_{\text{eff}} > 1000$ , where  $M_{\text{eff}}$  denotes the number of sequences with less than 80%  
17 identity). The sequence libraries were then aligned within each subfamily using a stair-  
18 shaped guide tree<sup>53</sup> in the MUSCLE alignment algorithm<sup>54</sup>. The resulting MSAs were  
19 then used as input for Direct Coupling Analysis (DCA), where the aim is to fit a Potts  
20 model with functional form<sup>31</sup>:

$$21 \quad P(x_i^n | x_{-i}^n) = \frac{1}{Z_i} \exp(v_i(x_i^n) + \sum_{j=1}^L w_{i,j}(x_i^n, x_j^n)) \quad (1)$$

22 where the conditional probability represents the information from the entire MSA given  
23 the model parameters  $v_i$  (representing position-wise information) and  $w_{i,j}$  (representing  
24 pair-wise information). The notation  $x_{-i}^n$  denotes the MSA without accounting for the  
25  $i$ :th sequence. Thus, for every sequence, all other sequences are used to estimate the  
26 probability of observing the parameters. Parameters were fitted using maximizing the  
27 pseudolikelihood of observing a set of  $N$  sequences of length  $L$ <sup>55</sup>:

$$28 \quad \mathcal{L}(v, w | (x_0^0, \dots, x_L^0) \dots (x_0^N, \dots, x_L^N)) = \sum_{n=1}^N \sum_{l=0}^L \ln P(x_i^n | x_{-i}^n, v, w) \quad (2)$$

29 Since the information about the pairwise information is contained within the  $w$   
30 parameter, the evolutionary couplings  $C_{i,j}$  in a coevolution matrix  $C$  were calculated  
31 according to equation 3, and afterwards standardized to the  $N(0,1)$  distribution.



$$1 \quad C_{i,j} = \sum_{A=0}^{20} \sum_{B=0}^{20} w_{i,j}(A, B) \quad (3)$$

2 The resulting coevolution maps had an average false positive rate (FPR) of 8.4% for  
3 the top 500 coevolving pairs, which corresponds to an average of 42 contacts. The  
4 coevolution maps from each sequence cluster were combined into a global coevolution  
5 map by calculating the average coevolution score at each position. Since members of  
6 the family were picked roughly equidistantly in sequence space (a sequence identity of  
7 around 50%, where possible), coevolution maps were weighted equally. In general, this  
8 procedure ensures that family-wide features are upweighted, whereas features present  
9 in only a few coevolution maps are down-weighted.

10 Importantly, we did not choose to include all contacts, but merely the top  $t$  ones that  
11 were determined to be sufficient for distinguishing conformational states.  $t$  was  
12 determined using a procedure based on the available experimental structures. First,  
13 experimental contact maps were calculated, where contacts were estimated from  
14 distances between pairs of residues filtered by a sigmoid function:

$$15 \quad M(A, B) = \frac{1}{1 + \exp(2r_{A,B} - 8)} \quad (4)$$

16 where  $r_{A,B}$  is the minimum distance between residues A and B.

17 Second, similarity between contact maps were defined as

$$18 \quad d(x, y) = \langle C_{tot} \otimes M_x, C_{tot} \otimes M_y \rangle \quad (5)$$

19 , which was used to calculate a distance matrix between all experimental structures.  
20 Third, UMAP<sup>56</sup> was used to obtain a 1D embedding of all experimental structures from  
21 the distance matrix, for which the pair-wise symmetrical KL-divergence<sup>57</sup> between the  
22 five distributions was calculated. This KL-divergence was minimized with respect to  
23 the parameter  $t$ . The described procedure yielded a  $t$  of 183.

24

## 25 **State-specific structure prediction**

26 A Convolutional Neural Network (CNN) was trained to classify the 5 functional states  
27 using contact maps from experimentally determined structures.

28 The input layer was of the size  $N^2 \times C$ , where  $N$  is the number of total number of MSA  
29 columns, and  $C$  the number of experimentally determined contact maps. The output

1 layer was a simple vector with 5 nodes, each corresponding to an experimentally  
2 characterized state.

3 The network architecture was designed to filter experimental contact maps by  
4 coevolution scores, and to avoid redundancy between adjacent residues involved in  
5 contacts. To implement these criteria, the input layer was followed by a filtering layer  
6 based on the optimized coevolution maps and by a pooling layer that gathered contacts  
7 formed by adjacent residue pairs. Lastly, two convolutions with sigmoid activation  
8 were applied to yield the output layer through an intermediate hidden layer. The 30-  
9 dimensional hidden layer was included to ensure that one contact could appear  
10 combinatorically in different states.

11 The loss function (equation 6) contained L2-regularization to prevent explosion of the  
12 weights.

$$13 \quad L(e, d) = \sum_{i=0}^n (e_i - d_i)^2 + \sum_{i=0}^n e_i^2 \quad (6)$$

14 , where  $e$  is the value of the output nodes during training and  $d$  the target values of the  
15 same nodes. Training involved thorough regularization and constriction e.g. by the  
16 aforementioned pooling but as the training set only contained contact maps from 36  
17 individual chains, many of which originating from the same deposition, overfitting the  
18 network was unavoidable<sup>58</sup>. The resulting model should thus not be used to make  
19 predictions.

20 To identify encouraged and discouraged contacts for each state, we performed layer-  
21 wise relevance backpropagation (LRP)<sup>32</sup> on all 5 output classes separately. Moreover,  
22 these scores are visualized for each feature contact pair with  $>0.1$  relevance in figure 3,  
23 where highly scoring pairs in the pooling layer are highlighted with thick bands.

24 The contacts that scored more than 0.1 through LRP were used to apply attractive and  
25 repulsive biases to guide starting models towards the desired functional state.  
26 Specifically, initial structures for each family member were downloaded from the  
27 AlphaFold2 database website. Then, MultiConstraint (repulsive) and  
28 AmbiguousConstraint (attractive) bias functions were applied to all heavy atom  
29 distance pairs in the RosettaMP minimization scheme with implicit solvent and  
30 membrane<sup>33</sup>. For repulsive MultiConstraint, the built-in Rosetta fade function was  
31 applied. For attractive AmbiguousConstraint, simple flat harmonics were applied. The

1 force constants were deliberately chosen as weak ( $< 20$  Rosetta standard units) in  
2 relation to the native forces of the all atom energy function called  
3 `membrane_highres_Menv_smooth`<sup>59</sup>. The weight of the added constraints was 0.1 as  
4 not to overshadow the natural energetics of the protein system. The protein-membrane  
5 topology was predicted using TOPCONS<sup>60</sup>, which was accounted for using the  
6 `AddMembraneMover`. To fold the protein with the modified energy function, energy  
7 minimization with a Monte-Carlo component was applied using the provided `fastrelax`  
8 algorithm with 5 repeats. The optimization was conducted in cartesian space (using a  
9 `pro_close` weight of 0. and `cart_bonded` weight of 0.5 as recommended for cartesian  
10 minimization), rather than in Z-matrix form such that the constraints could be applied  
11 correctly.

12 Additionally, to assess the quality of the predicted structures, the RMSD towards the  
13 structure of the closest available relative in the same conformational state was  
14 calculated. The closest available relative was determined by the BLOSUM62 distance<sup>61</sup>  
15 matrix, after filtering for the appropriate conformational state.

16

17

## 18 **Molecular Dynamics simulations**

19 All Molecular Dynamics (MD) simulations were carried out in GROMACS2021<sup>62</sup>. The  
20 simulation systems containing the predicted structures of GLUT5 in the outward open,  
21 outward occluded, inward occluded and inward open states were prepared using the  
22 CHARMM-GUI membrane builder<sup>63</sup>. The systems contained the protein, embedded in  
23 a POPC bilayer plunged in a 0.1M KCl solution. The initial PBC box was 85x85x94  
24 Å<sup>3</sup>, ensuring at least 12.5 Å of water molecules between the protein and the PBC box  
25 end at least 10 lipid molecules between each PBC copy of the protein. The force field  
26 used was CHARMM36m for protein and lipids<sup>64</sup>, and TIP3P<sup>65</sup> for water. The models  
27 were equilibrated using the default CHARMM-GUI scheme with one minimization  
28 step, and 6 100ps restraint cycles with gradually released restraints in the NPT  
29 ensemble, followed by a production simulation of 10ns. The simulations were carried  
30 out using a 2-fs time step. The target temperature and pressure were set to 303.15K and  
31 1 bar respectively and maintained by a Nose-Hoover thermostat<sup>66</sup> (coupling separately  
32 protein, lipids and solvent) and a Parrinello-Rahman barostat<sup>67</sup> with semi-isotropic

1 coupling ( $p=5.0$ , compressibility  $4.5 \cdot 10^{-5}$ ). Hydrogen bonds were constrained using  
2 the linear constraint solver (LINCS)<sup>68</sup>, and long-range electrostatics were accounted for  
3 using the particle mesh Ewald (PME) method beyond the  $12\text{\AA}$  electrostatic cutoff<sup>69</sup>. A  
4 neighbor-list cutoff was used for vdw interactions with  $r_{\text{vdw}}=12\text{\AA}$  and a switching  
5 function starting at  $10\text{\AA}$ .

6

## 7 **Collective variable determination**

8 A support vector machine (SVM)<sup>70</sup> was trained on all predicted structures to separate  
9 adjacent states (outward occluded and outward open, outward occluded and inward  
10 occluded, and inward occluded and inward open). We avoided training on the occluded  
11 state given that only one sugar porter, pfHT1, was resolved in that state, possibly  
12 representing a functional outlier. To also keep track of the species-specific features of  
13 each model, we performed PCA<sup>71</sup> on the same training set (represented in the y-axis of  
14 figure S2, supplementary information). Indeed, the same procedure on the alphafold<sup>27</sup>  
15 input structures showed that the highest variance was in species-specificity, not  
16 conformational states. Ideally, we sought to preserve the species-specific features while  
17 only switching conformational states.

18 The highest SVM coefficients ( $> 0.193$ , as determined by the first gap in the histogram  
19 of coefficients) were divided into two separate components based on their sign. This  
20 yielded two collective variables, with  $CV_1$  describing contacts specific to state 1 and  
21  $CV_2$  describing contacts specific to state 2:

$$22 \quad CV_1 = \frac{1}{\sum_{i=0}^N \max(0, c_i)} \sum_{i=0}^N \max(0, c_i) * x_i \quad (7)$$

$$23 \quad CV_2 = \frac{1}{\sum_{i=0}^N \min(0, c_i)} \sum_{i=0}^N -\min(0, c_i) * x_i \quad (8)$$

24 where  $x_i$  is the minimum distance between the two residues, and  $c_i$  the value of the  
25 coefficient from the SVM of contact  $i$ . The normalization factor was included to  
26 facilitate interpretability and to avoid assertion failures within the molecular dynamics  
27 code used. Given CV construction, a high value of  $CV_j$  thus corresponds to a low  
28 amount contacts specific to state  $j$ .

29

## 1 Accelerated Weight Histogram simulations

2 To reconstruct the complete conformational cycle of GLUT5, enhanced sampling  
3 simulations were run using the accelerated weighted histogram (AWH) method as  
4 implemented in GROMACS2021<sup>62</sup>.

5 Three distinct AWH simulations were run to model each transition, using as CVs the  
6 relationships between distances described in eq. 7 and 8. These CVs were coupled to a  
7 reference coordinate  $\xi(x)$  using a harmonic restraint function, using different force  
8 constants for each process (Table 1). The target distribution was chosen as uniform with  
9 a free-energy cutoff of 40-60 kJ/mol (Table 1) to avoid sampling of regions of high free  
10 energies. The free energy estimate was updated each 100 steps, gathering data from  
11 every previous tenth step.

12 During the initial phase, the update bias size is first held constant (using a diffusion  
13 constant, as specified in Table 1, and an initial error of 10 kJ/mol), and then divided by  
14 three each time the CVs covers the entire target region. After the number of visits at  
15 each point grows larger than the histogram size at that point, the initial phase is exited,  
16 after which the update size is continuously and exponentially decreased according to  
17 an exp-linear setting. All AWH simulations were run with 4 walkers in parallel with 2  
18 starting in each conformational state at the extremes of each process.

19 Convergence of the AWH calculations was determined according to three criteria: the  
20 free energy landscape was stable over time, the coordinate distribution along the  
21 minimum free energy path reached a standard deviation of less than 0.1 from the mean  
22 coordinate distribution, and the changes in free energy estimate were below 0.5kJ/mol.  
23 The simulations were extended by 25 ns after these three criteria were met to ensure  
24 that these properties held true over time. The regions of high free energy (above the  
25 process-specific cutoff, see table 1) of the free energy landscape were excluded from  
26 the convergence analysis. To assess the convergence graphically, the 2-norm every  
27 100ps was calculated (Figure S1).

28 Since four independent walkers were used a coverage diameter of 4Å was introduced,  
29 which forces each walker to explore an area of 4Å around every point before sharing  
30 the bias with all other walkers. In practice, this results in walkers overlapping in phase  
31 space, which provides each point with a free energy estimate based on multiple walkers.

1 Effectively, this provides an inherent CV quality control for the method as different  
2 walkers should produce consistent free energy estimates.

3 Seeing as all three processes (outward opening, rocker switch and inward opening) were  
4 run independently, we needed a method to combine the results into one free energy  
5 landscape. To this end, we calculated the minimum free energy paths between the  
6 deepest basins in the free energy landscapes by the following procedure. First, placing  
7 60 points along a random path in the landscapes and relaxing the points by steepest  
8 decent on the landscape. Second, the position of the points was updated by forcing  
9 equidistance. The procedure was repeated until reaching convergence with a tolerance  
10 of 0.01Å. Due to the randomness in choosing the initial path and risk of ending up in a  
11 local minimum this procedure was repeated 100 times, where the minimum energy path  
12 was determined as the one with the lowest barrier. With the minimum free energy paths  
13 for each landscape calculated, the 2D free energy landscape was projected onto the path  
14 by Boltzmann averaging all the closest points to each point along the path. The 1D free  
15 energy landscapes were then stitched together by cutting the paths off where the  
16 minimum RMSD between two adjacent processes was found, yielding one concatenated  
17 free energy landscape for all three processes.

18

19

1 **Acknowledgements** This work was funded by the Knut and Alice Wallenberg  
2 Foundation (D.D) and the Science for Life Laboratory (D.D and L.D), the Göran  
3 Gustafsson Foundation (D.D and L.D) and the Swedish Research Council (VR 2019-  
4 02433 to D.D and L.D). The MD simulations were performed on resources provided by  
5 the Swedish National Infrastructure for Computing (SNIC) on Beskow at the PDC  
6 Center for High Performance Computing (PDC-HPC).

7

8 **Data availability** The data necessary to reproduce this work is openly available at  
9 <https://osf.io/qdmpx/>

10

11 **Author contributions** Conceptualization DM, DD, LD ; Data Curation DM ; Formal  
12 Analysis DM ; Funding Acquisition DD, LD ; Investigation DM SM CA MB DD LD ;  
13 Methodology DM ; Project Administration DD, LD ; Resources DD, LD ; Software  
14 DM ; Supervision DD, LD; Validation DM SM CA MB DD LD ; Visualization DM,  
15 SM ; Writing – Original Draft Preparation DM DD LD ; Writing – Review & Editing  
16 DM SM CA MB DD LD

17

18

19

20

21

22

23

24

25

26

27

28

29

30

31

32

1  
2  
3  
4  
5

6 **Table 1.** Input parameters used for the AWH simulations. The force constant  
7 determines the resolution of the free energy surface and the bias towards the reference  
8 coordinate. The cover diameter determines the radius in CV space that has to be covered  
9 before a walker shares the bias at that point. The free-energy cutoff determined at which  
10 level sampling is deemed uninteresting. The convergence time is the simulation time  
11 per walker that was needed to achieve convergence according to the stated criteria.

12

|                 | Diffusion Constant<br>nm <sup>2</sup> ps <sup>-1</sup> |        | Force constant kJ<br>mol <sup>-1</sup> nm <sup>-2</sup> |       | Cover diameter<br>nm |     | Free-energy cutoff kJ<br>mol <sup>-1</sup> | Convergence time<br>ns/walker |
|-----------------|--------------------------------------------------------|--------|---------------------------------------------------------|-------|----------------------|-----|--------------------------------------------|-------------------------------|
|                 | CV1                                                    | CV2    | CV1                                                     | CV2   | CV1                  | CV2 |                                            |                               |
| Outward Opening | 0.0005                                                 | 0.001  | 10000                                                   | 50000 | 0.4                  | 0.4 | 60                                         | 374                           |
| Rocker switch   | 0.001                                                  | 0.001  | 50000                                                   | 50000 | 0.4                  | 0.4 | 60                                         | 653                           |
| Inward Opening  | 0.0005                                                 | 0.0005 | 30000                                                   | 30000 | 0.4                  | 0.4 | 40                                         | 86                            |

13  
14  
15  
16  
17  
18  
19



1

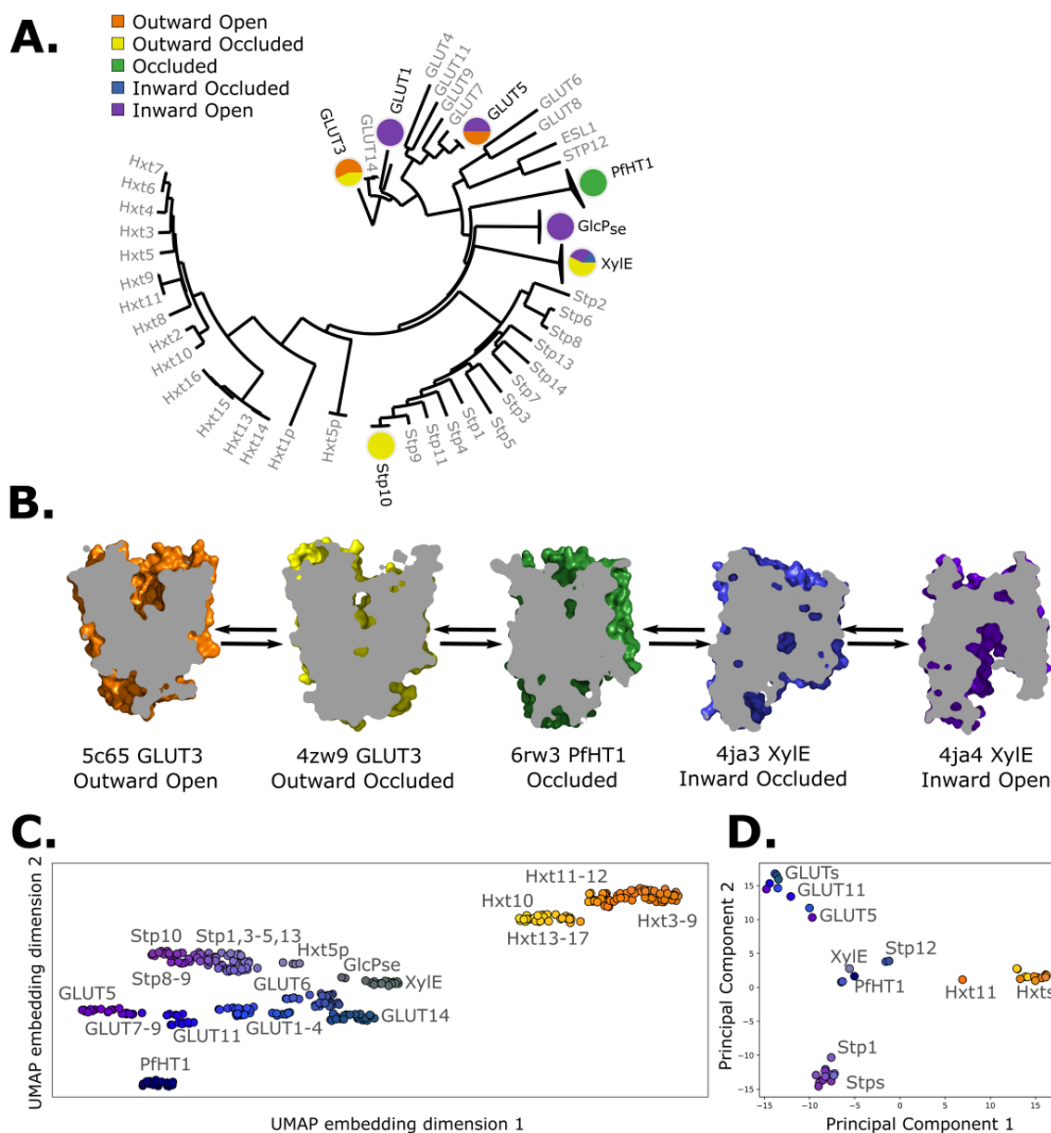

2  
 3 **Figure 1. Available structural and evolutionary information** **A.** The phylogenetic  
 4 tree of the sugar transporter family, based on an multiple sequence alignment calculated  
 5 by the MUSCLE algorithm. Tree generated using iTOL. The available experimental  
 6 structures for each branch are highlighted as colored circles in the proportions that they  
 7 appear in. The subfamilies represented in this tree are the mammalian sugar transporters  
 8 (GLUTs), the bacterial and parasitic outliers (pfHT1, Xyle and GlcP<sub>se</sub>), the plant sugar  
 9 transporters (STPs), and the fungal hexose transporters (HXTs). Sequences were  
 10 retrieved from UniProtKB **B.** Clipped surfaces of representative structures of each  
 11 functional state arranged according to the conformational cycle of sugar transporters.  
 12 Note the alternating access to the intracellular and extracellular solvents throughout the  
 13 cycle. **C.** A 2D embedding of the sugar transporter family in sequence space, using as  
 14 similarity measure scores from the BLOSUM62-derived distance matrix. The  
 15 embedding displays the phylogenetic distance between different branches of the family  
 16 and SP are labeled as dots, colored according to their phylogenetic proximity. **D.** PCA  
 17 projection of the available AlphaFold2 models in the sugar transporter family using as  
 18 features residue-residue distances. SPs cluster according to phylogenetic proximity  
 19 rather than conformational state

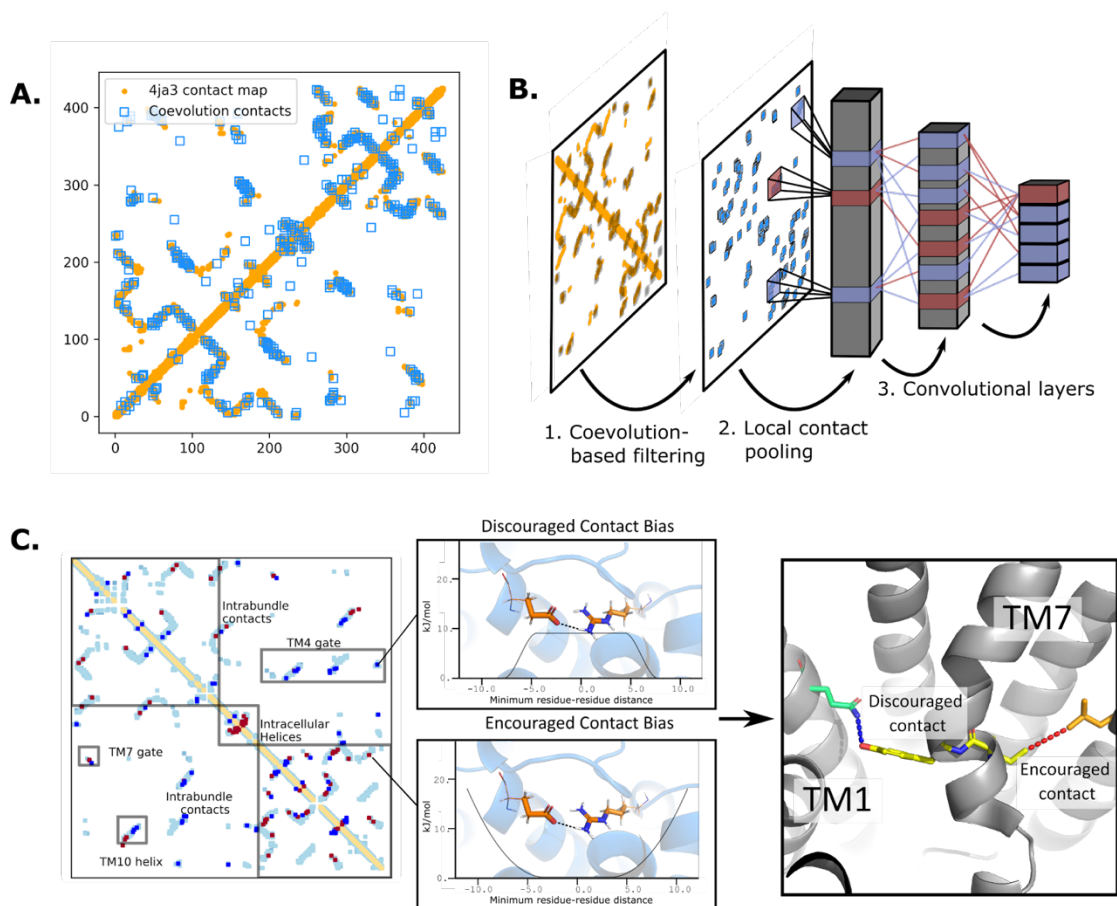

1  
2

3 **Figure 2. The state-specific structure prediction method.** A. An overlay of the top  
 4 200 coevolving residue pairs (blue) and the experimental contact map of the bacterial  
 5 XylE structure 4ja3 in an inward occluded state (orange). The secondary structure  
 6 contacts from the coevolutionary analysis were omitted B. The architecture of the  
 7 neural network used to train to predict conformational states from contacts between  
 8 residue pairs. The first step consists in filtering out the low-coevolving contacts by the  
 9 coevolution-based filtering, after which a restricted convolutional layer works to pool  
 10 together close contacts in 4x4 grids, to account for the fact that contacts between  
 11 adjacent positions often serve similar functions. Then, two unrestrained convolutions  
 12 connect the aforementioned layer to the hidden layer and to the 5-dimensional output  
 13 layer, each node representing a single conformational state. C. The bias application.  
 14 The highly encouraged and discouraged contacts are translated into Ambiguous  
 15 Constraint and Multi Constraint type biases in the RosettaMP fastrelax module, with  
 16 the functional forms displayed in the middle panel. Using as input Alphafold2 models  
 17 of each member in the family, the biases are applied and the energy is minimized in a  
 18 Monte-Carlo fashion, repeated to generate 100 models. The final structure is chosen as  
 19 the model with the lowest energy score value.

1  
2

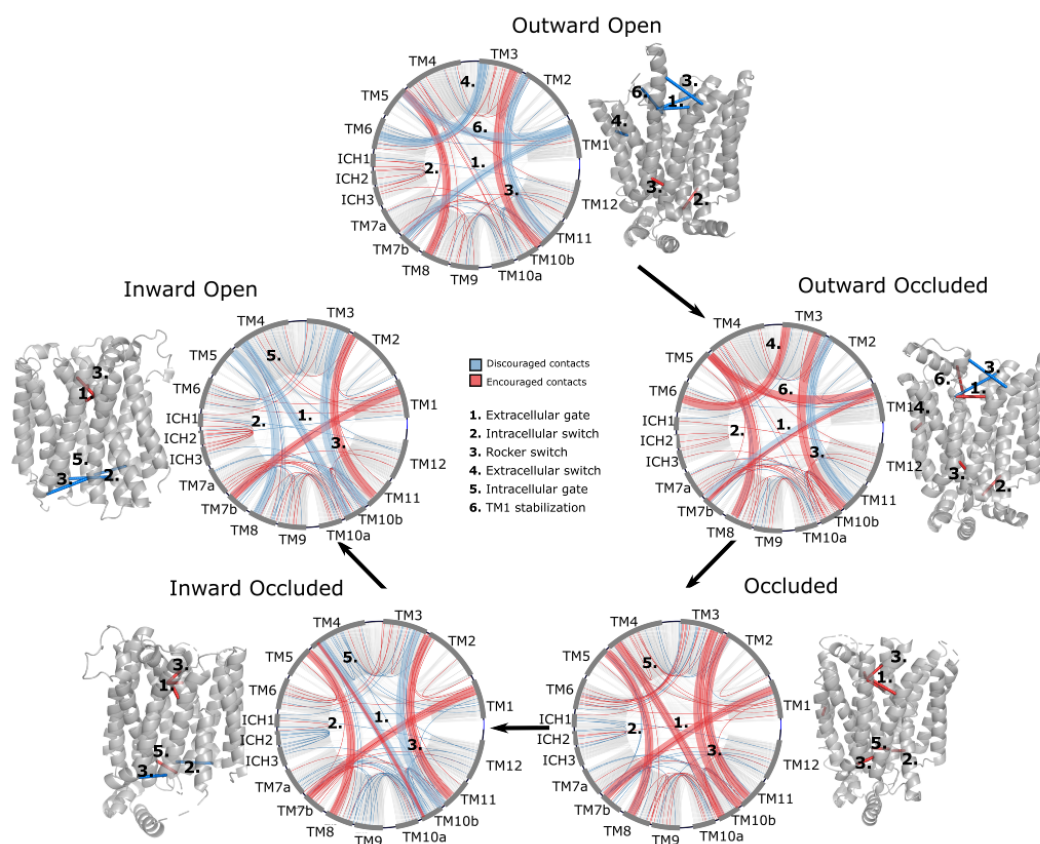

3  
4  
5

6 **Figure 3. Network representations of the state-specific contact maps from the LRP**  
7 **analysis of the trained neural network.** Nodes are labelled by the helix they are a part  
8 of, and the edges are colored by their sign in the LRP - blue represents discouraged  
9 contacts, and red represents encouraged contacts. Consensus contact maps of all states  
10 are shown in light grey in the background. Residue bundles that are encouraged or  
11 discouraged in a concerted manner (as revealed by their high importance in the pooling  
12 hidden layer of the neural network, Table S2) are highlighted with thick lines.

13  
14  
15  
16  
17  
18  
19  
20

1  
2  
3  
4  
5  
6  
7  
8  
9  
10  
11  
12  
13  
14  
15  
16  
17  
18  
19  
20  
21  
22  
23  
24  
25  
26  
27  
28  
29  
30  
31  
32  
33  
34  
35  
36  
37  
38  
39  
40  
41  
42  
43  
44  
45  
46  
47  
48

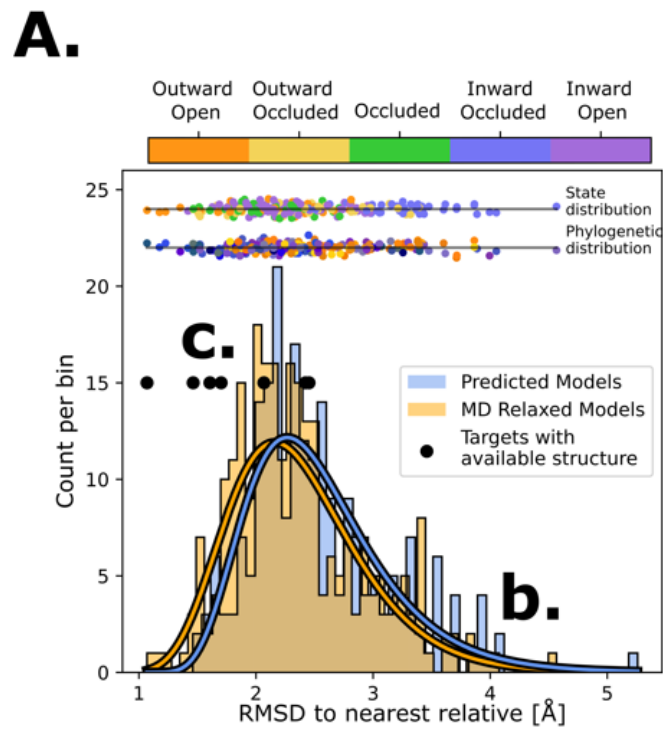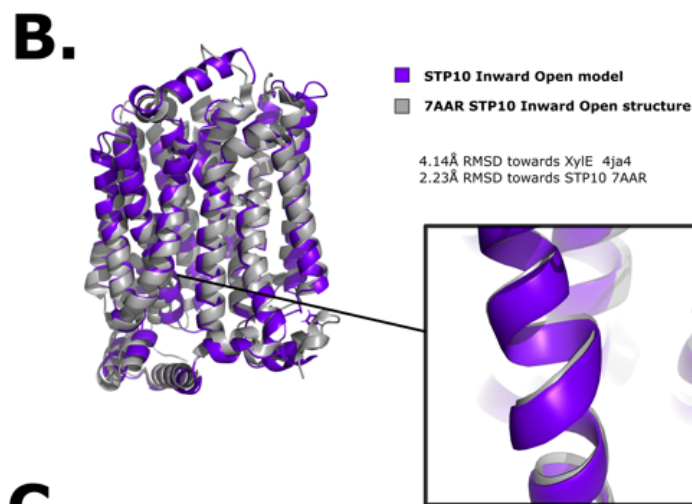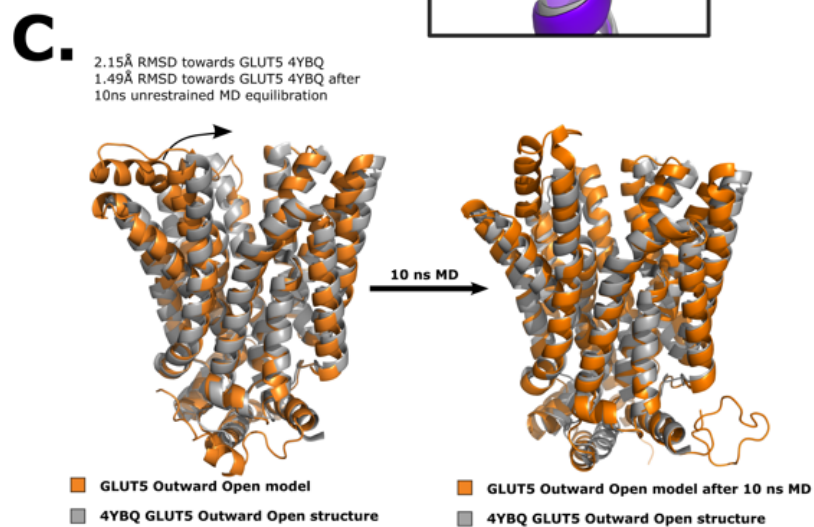

1  
2  
3  
4  
5  
6  
7  
8  
9  
10  
11  
12  
13  
14  
15  
16  
17  
18  
19  
20

**Figure 4. Quality of structure prediction of state-specific models of SPs** **A.** Histogram of RMSD of the structural models (Rosetta, blue and MD-relaxed, orange) from their closest relative in the same conformational state. The distributions of the MD-relaxed structures colored according to state and phylogeny (see color definition in figure 1C) are shown above the histogram. Additionally, the targets with available experimental structures are indicated with black dots. **B.** Alignment between STP10 inward open model and the newly solved 7AAR STP10 structure in the same conformational state. A helical kink not present in any experimentally determined structure so far is shown as an example of a species-specific feature that is captured by our structure-prediction protocol. **C.** (left) Alignment between the GLUT5 outward-open model and an experimental structure of the same isoform in the same state (PDB ID 4YBQ). (right) Alignment between the MD-relaxed GLUT5 outward-open model and PDB 4YBQ.

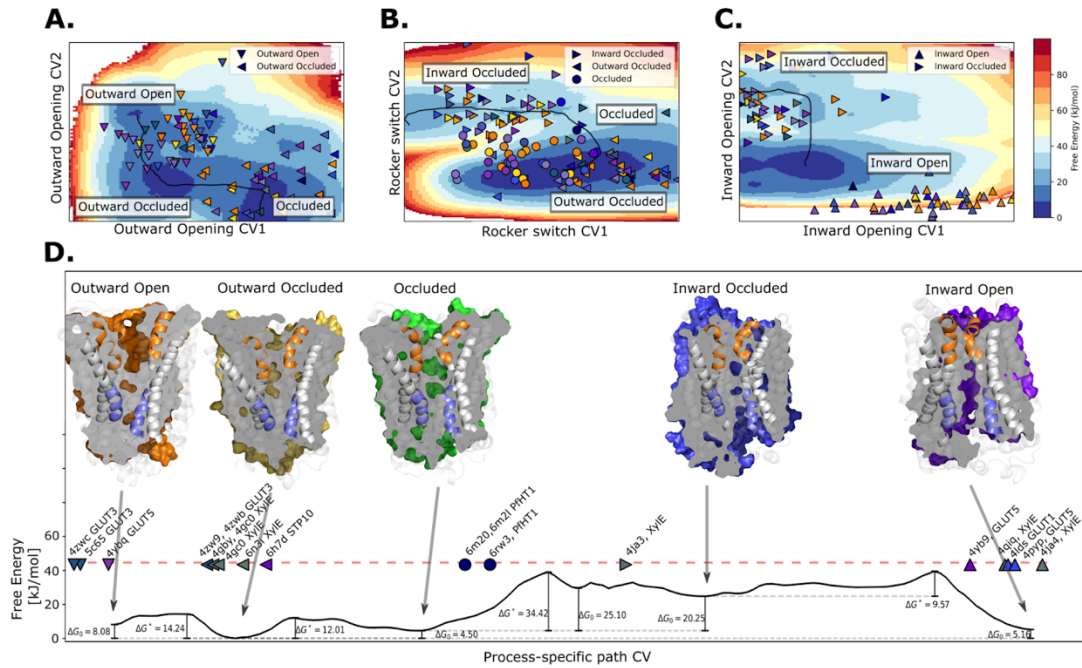

1  
2  
3  
4  
5  
6  
7  
8  
9  
10  
11  
12  
13  
14  
15  
16  
17  
18  
19  
20  
21  
22  
23  
24  
25  
26

**Figure 5. The entire conformational cycle is captured by accelerated weight histogram simulations.** **A.** Free energy landscape of the outward opening process. The most populated free energy basins are labeled according to annotation based on visual inspection and RMSD calculations of snapshots from the basins to the available experimentally determined structures. Projections of models of the outward open and outward occluded models of the various SPs are shown as symbols colored according to figure 1C. The minimum free energy path connecting the outward open and occluded states is highlighted in black. Note that many outward occluded models fall in the basin representing the occluded state, most likely because of the small structural difference between a bent and broken TM7b helix. **B.** Free Energy landscape of the rocker switch process. Representation as in A. Note that although not trained on the occluded models, models mostly either fall in the barrier region or in the GLUT5 occluded basin. **C.** Free Energy landscape of the inward opening process. Representation as in A. **D.** 1-D free energy landscape of the full conformational change, determined by stitching together minimum free energy paths in panels A-C. The concatenation points were found by determining where along the respective minimum energy surfaces the maximum structural overlap (according to the RMSD metric) was found. Representative structural models of each of the most populated basins for are found at the top of the panel, and the projected positions of the experimental structures are shown along the dashed red line.

1

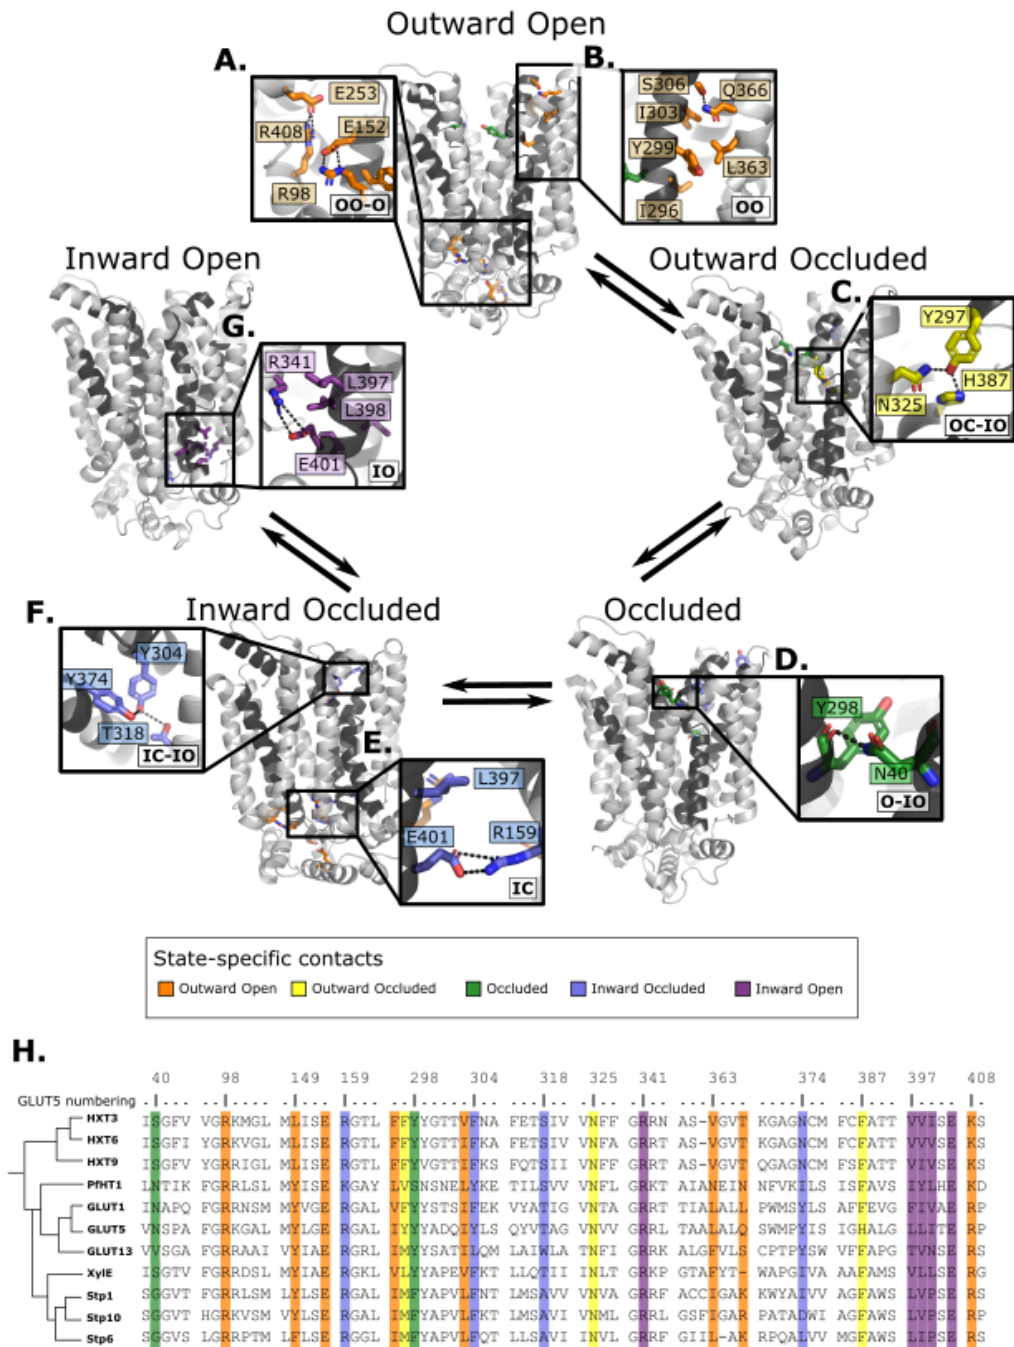

2  
3  
4 **Figure 6. Summary of the structural determinants responsible for the cycling**  
5 **between adjacent conformational states.** Contacts are characteristic of the first  
6 conformation they appear in, but they can be maintained more or less throughout the  
7 cycle depending on the family members. The snapshots are of the GLUT5 models used  
8 as a representative member. The bottom right of every panel contains information about  
9 which states the contacts are present in. (Outward Open/closed (OO/OC), occluded (O)  
10 or Inward Open/Closed (IO/IC)) **A.** Salt bridge network at the intracellular side. This  
11 network is intact in all outward facing states, but breaks during the rocker switch  
12 motion (except for the E401/R159 contact, see panel E). **B.** TM7b-TM9 interface responsible  
13 for stabilizing the outward-open conformation of TM7b, of which the hydrophobic  
14 contacts are only present in the outward open state. **C.** TM7b contact network

1 responsible for promoting both the bent and broken conformation of TM7b. The  
2 position of N325 and H387 necessitates the rotation of TM7b which occludes the  
3 extracellular gate. **D.** Backbone contact formed between TM7b and TM1, which is only  
4 possible when TM7b is completely broken. **E.** TM10b-TM4 interactions that are the  
5 last occluding contacts to break before the intracellular gate opens. **F.** TM10a-TM8  
6 contacts responsible for stabilizing the new inter-bundle angle present in the inward  
7 facing states. **G.** Salt bridge and hydrophobic nexus responsible for stabilizing the  
8 inward-open conformation of TM10b, which fully unblocks the binding site from the  
9 intracellular side. **H.** MSA of some representative members at positions shown  
10 throughout panels A-G. Since model training was performed on all predicted models  
11 using highly coevolving residue pairs as features, the type of interaction present in  
12 different subfamilies can be tracked in this MSA.  
13



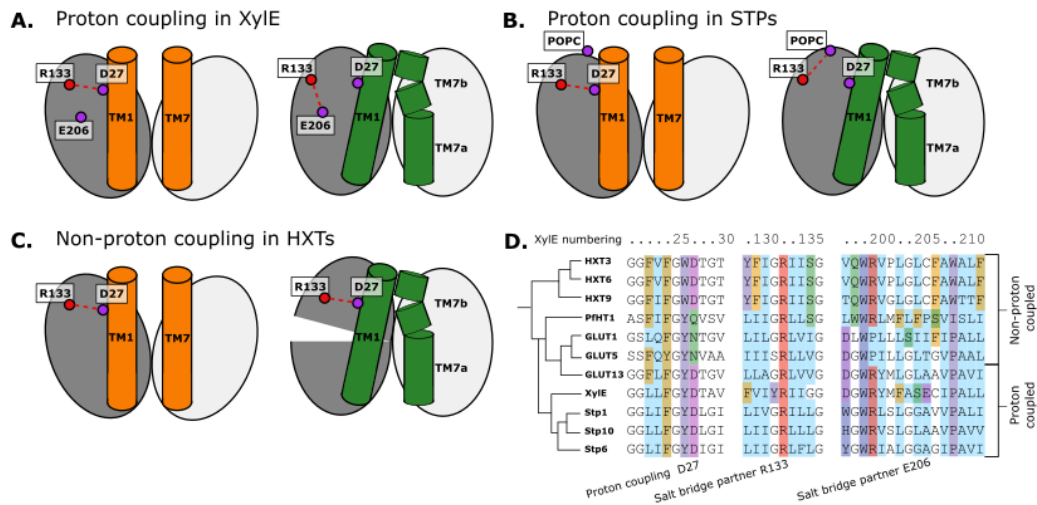

1  
2 **Figure 7. Structural and Evolutionary basis for proton coupling in the sugar**  
3 **transporter family.** **A.** Proposed cartoon model for proton coupling in Xyle, showing  
4 the highlighted salt bridge network rearrangements between the outward open (orange)  
5 and occluded (green) conformational states. Note how these rearrangements facilitate  
6 the closure of the extracellular gate. **B.** Proposed cartoon model for proton coupling in  
7 the STPs, showing the highlighted salt bridge network rearrangements between the  
8 outward open (orange) and occluded (green) conformational states. Note how these  
9 rearrangements facilitate the closure of the extracellular gate, and how R133 interacts  
10 with another latent salt bridge partner than in Xyle. **C.** Proposed cartoon model  
11 explaining why HXTs generally lack proton coupling, showing the highlighted salt  
12 bridge network rearrangements between the outward open (orange) and occluded  
13 (green) conformational states. Note how the crucial R133-D27 contact can stay formed  
14 even in the occluded state due to a tilt of the entire helical bundle. **D.** MSA of a selected  
15 subset of proton-coupled and non-proton coupled sugar transporters, with residues  
16 labeled according to the Xyle numbering.

17  
18

## References

- 1 Koepsell, H. Glucose transporters in brain in health and disease. *Pflugers Arch* **472**, 1299-1343 (2020). <https://doi.org/10.1007/s00424-020-02441-x>
- 2 Drew, D., North, R. A., Nagarathinam, K. & Tanabe, M. Structures and General Transport Mechanisms by the Major Facilitator Superfamily (MFS). *Chem Rev* (2021). <https://doi.org/10.1021/acs.chemrev.0c00983>
- 3 Reddy, V. S., Shlykov, M. A., Castillo, R., Sun, E. I. & Saier, M. H., Jr. The major facilitator superfamily (MFS) revisited. *FEBS J* **279**, 2022-2035 (2012). <https://doi.org/10.1111/j.1742-4658.2012.08588.x>
- 4 Wang, W. W., Gallo, L., Jadhav, A., Hawkins, R. & Parker, C. G. The Druggability of Solute Carriers. *J Med Chem* **63**, 3834-3867 (2020). <https://doi.org/10.1021/acs.jmedchem.9b01237>
- 5 Cesar-Razquin, A. *et al.* A Call for Systematic Research on Solute Carriers. *Cell* **162**, 478-487 (2015). <https://doi.org/10.1016/j.cell.2015.07.022>
- 6 Holman, G. D. Structure, function and regulation of mammalian glucose transporters of the SLC2 family. *Pflugers Arch* **472**, 1155-1175 (2020). <https://doi.org/10.1007/s00424-020-02411-3>
- 7 Mueckler, M. & Thorens, B. The SLC2 (GLUT) family of membrane transporters. *Mol Aspects Med* **34**, 121-138 (2013). <https://doi.org/10.1016/j.mam.2012.07.001>
- 8 Huang, S. & Czech, M. P. The GLUT4 glucose transporter. *Cell Metab* **5**, 237-252 (2007). <https://doi.org/10.1016/j.cmet.2007.03.006>
- 9 Rand, E. B., Depaoli, A. M., Davidson, N. O., Bell, G. I. & Burant, C. F. Sequence, tissue distribution, and functional characterization of the rat fructose transporter GLUT5. *Am J Physiol* **264**, G1169-1176 (1993).
- 10 Douard, V. & Ferraris, R. P. Regulation of the fructose transporter GLUT5 in health and disease. *Am J Physiol Endocrinol Metab* **295**, E227-237 (2008). <https://doi.org/10.1152/ajpendo.90245.2008>
- 11 Nino-Gonzalez, M., Novo-Uzal, E., Richardson, D. N., Barros, P. M. & Duque, P. More Transporters, More Substrates: The Arabidopsis Major Facilitator Superfamily Revisited. *Mol Plant* **12**, 1182-1202 (2019). <https://doi.org/10.1016/j.molp.2019.07.003>
- 12 Boles, E. & Hollenberg, C. P. The molecular genetics of hexose transport in yeasts. *FEMS Microbiol Rev* **21**, 85-111 (1997). <https://doi.org/10.1111/j.1574-6976.1997.tb00346.x>
- 13 Wang, M., Yu, C. & Zhao, H. Identification of an important motif that controls the activity and specificity of sugar transporters. *Biotechnol Bioeng* **113**, 1460-1467 (2016). <https://doi.org/10.1002/bit.25926>
- 14 Woodrow, C. J., Penny, J. I. & Krishna, S. Intraerythrocytic Plasmodium falciparum expresses a high affinity facilitative hexose transporter. *J Biol Chem* **274**, 7272-7277 (1999).
- 15 Blume, M. *et al.* A constitutive pan-hexose permease for the Plasmodium life cycle and transgenic models for screening of antimalarial sugar analogs. *FASEB J* **25**, 1218-1229 (2011). <https://doi.org/10.1096/fj.10-173278>
- 16 Qureshi, A. A. *et al.* The molecular basis for sugar import in malaria parasites. *Nature* **578**, 321-325 (2020). <https://doi.org/10.1038/s41586-020-1963-z>
- 17 Drew, D. & Boudker, O. Shared Molecular Mechanisms of Membrane Transporters. *Annu Rev Biochem* **85**, 543-572 (2016). <https://doi.org/10.1146/annurev-biochem-060815-014520>

- 1 18 Maiden, M. C., Davis, E. O., Baldwin, S. A., Moore, D. C. & Henderson, P. J.  
2 Mammalian and bacterial sugar transport proteins are homologous. *Nature* **325**,  
3 641-643 (1987). <https://doi.org/10.1038/325641a0>
- 4 19 Quistgaard, E. M., Low, C., Moberg, P., Tresaugues, L. & Nordlund, P.  
5 Structural basis for substrate transport in the GLUT-homology family of  
6 monosaccharide transporters. *Nat Struct Mol Biol* **20**, 766-768 (2013).  
7 <https://doi.org/10.1038/nsmb.2569>
- 8 20 Deng, D. *et al.* Molecular basis of ligand recognition and transport by glucose  
9 transporters. *Nature* **526**, 391-396 (2015). <https://doi.org/10.1038/nature14655>
- 10 21 Nomura, N. *et al.* Structure and mechanism of the mammalian fructose  
11 transporter GLUT5. *Nature* **526**, 397-401 (2015).  
12 <https://doi.org/10.1038/nature14909>
- 13 22 Deng, D. *et al.* Crystal structure of the human glucose transporter GLUT1.  
14 *Nature* **510**, 121-125 (2014). <https://doi.org/10.1038/nature13306>
- 15 23 Deng, D. *et al.* Molecular basis of ligand recognition and transport by glucose  
16 transporters. *Nature* (2015). <https://doi.org/10.1038/nature14655>
- 17 24 Nomura N, V. G., Kang HJ, Shimamura T, Nomura Y, Sonoda Y, Hussien S.A,  
18 &#x9;Qureshi A, Coincon M, Sato Y, Abe H, Nakada-Nakura Y, Hino T,  
19 Arakawa T, Kusano- &#x9;Arai O, Iwanari H, Unno H, Murata T, Kobayashi  
20 T, Hamakubo T, Kasahara M, Iwata &#x9;S, Drew D. . Structure and  
21 mechanism of the mammalian fructose transporter GLUT5. *Nature in press*  
22 (2015).
- 23 25 Wisedchaisri, G., Park, M. S., Iadanza, M. G., Zheng, H. & Gonen, T. Proton-  
24 coupled sugar transport in the prototypical major facilitator superfamily protein  
25 XylE. *Nat Commun* **5**, 4521 (2014). <https://doi.org/10.1038/ncomms5521>
- 26 26 Jiang, X. *et al.* Structural Basis for Blocking Sugar Uptake into the Malaria  
27 Parasite Plasmodium falciparum. *Cell* **183**, 258-268 e212 (2020).  
28 <https://doi.org/10.1016/j.cell.2020.08.015>
- 29 27 Jumper, J. *et al.* Highly accurate protein structure prediction with AlphaFold.  
30 *Nature* **596**, 583-589 (2021). <https://doi.org/10.1038/s41586-021-03819-2>
- 31 28 Harpole, T. J. & Delemotte, L. Conformational landscapes of membrane  
32 proteins delineated by enhanced sampling molecular dynamics simulations.  
33 *Biochim Biophys Acta Biomembr* **1860**, 909-926 (2018).  
34 <https://doi.org/10.1016/j.bbamem.2017.10.033>
- 35 29 Yang, Y. I., Shao, Q., Zhang, J., Yang, L. & Gao, Y. Q. Enhanced sampling in  
36 molecular dynamics. *J Chem Phys* **151**, 070902 (2019).  
37 <https://doi.org/10.1063/1.5109531>
- 38 30 Del Alamo, D., Sala, D., McHaourab, H. S. & Meiler, J. Sampling alternative  
39 conformational states of transporters and receptors with AlphaFold2. *Elife* **11**  
40 (2022). <https://doi.org/10.7554/eLife.75751>
- 41 31 Morcos, F. *et al.* Direct-coupling analysis of residue coevolution captures native  
42 contacts across many protein families. *Proc Natl Acad Sci U S A* **108**, E1293-  
43 1301 (2011). <https://doi.org/10.1073/pnas.1111471108>
- 44 32 Bach, S. *et al.* On Pixel-Wise Explanations for Non-Linear Classifier Decisions  
45 by Layer-Wise Relevance Propagation. *PLoS One* **10**, e0130140 (2015).  
46 <https://doi.org/10.1371/journal.pone.0130140>
- 47 33 Alford, R. F. *et al.* An Integrated Framework Advancing Membrane Protein  
48 Modeling and Design. *PLoS Comput Biol* **11**, e1004398 (2015).  
49 <https://doi.org/10.1371/journal.pcbi.1004398>

- 1 34 Bavnhoj, L., Paulsen, P. A., Flores-Canales, J. C., Schiott, B. & Pedersen, B. P.  
2 Molecular mechanism of sugar transport in plants unveiled by structures of  
3 glucose/H(+) symporter STP10. *Nat Plants* **7**, 1409-1419 (2021).  
4 <https://doi.org/10.1038/s41477-021-00992-0>
- 5 35 Yuan, Y. *et al.* Cryo-EM structure of human glucose transporter GLUT4. *Nat*  
6 *Commun* **13**, 2671 (2022). <https://doi.org/10.1038/s41467-022-30235-5>
- 7 36 Ke, M., Yuan, Y., Jiang, X., Yan, N. & Gong, H. Molecular determinants for  
8 the thermodynamic and functional divergence of uniporter GLUT1 and proton  
9 symporter XylE. *PLoS Comput Biol* **13**, e1005603 (2017).  
10 <https://doi.org/10.1371/journal.pcbi.1005603>
- 11 37 Park, M. S. Molecular Dynamics Simulations of the Human Glucose  
12 Transporter GLUT1. *PLoS One* **10**, e0125361 (2015).  
13 <https://doi.org/10.1371/journal.pone.0125361>
- 14 38 Galochkina, T., Ng Fuk Chong, M., Challali, L., Abbar, S. & Etchebest, C. New  
15 insights into GluT1 mechanics during glucose transfer. *Sci Rep* **9**, 998 (2019).  
16 <https://doi.org/10.1038/s41598-018-37367-z>
- 17 39 Chen, L. Y. & Phelix, C. F. Extracellular gating of glucose transport through  
18 GLUT 1. *Biochem Biophys Res Commun* **511**, 573-578 (2019).  
19 <https://doi.org/10.1016/j.bbrc.2019.02.067>
- 20 40 McComas S.E, M. D., Alleva C, Bonaccorsi M, Drew D, Delemotte L.  
21 Determinants of sugar-induced influx in the mammalian fructose transporter  
22 GLUT5. *bioRxiv* (2022).  
23 [https://doi.org:https://doi.org/10.1101/2022.06.17.495601](https://doi.org/https://doi.org/10.1101/2022.06.17.495601)
- 24 41 Lindahl, V., Lidmar, J. & Hess, B. Riemann metric approach to optimal  
25 sampling of multidimensional free-energy landscapes. *Phys Rev E* **98**, 023312  
26 (2018). <https://doi.org/10.1103/PhysRevE.98.023312>
- 27 42 Schurmann, A. *et al.* Role of conserved arginine and glutamate residues on the  
28 cytosolic surface of glucose transporters for transporter function. *Biochemistry*  
29 **36**, 12897-12902 (1997). <https://doi.org/10.1021/bi971173c>
- 30 43 Lowe, A. G. & Walmsley, A. R. The kinetics of glucose transport in human red  
31 blood cells. *Biochim Biophys Acta* **857**, 146-154 (1986).
- 32 44 Ezaki, O. & Kono, T. Effects of temperature on basal and insulin-stimulated  
33 glucose transport activities in fat cells. Further support for the translocation  
34 hypothesis of insulin action. *J Biol Chem* **257**, 14306-14310 (1982).
- 35 45 Selvam, B., Mittal, S. & Shukla, D. Free Energy Landscape of the Complete  
36 Transport Cycle in a Key Bacterial Transporter. *ACS Cent Sci* **4**, 1146-1154  
37 (2018). <https://doi.org/10.1021/acscentsci.8b00330>
- 38 46 Takemoto, M., Lee, Y., Ishitani, R. & Nureki, O. Free Energy Landscape for  
39 the Entire Transport Cycle of Triose-Phosphate/Phosphate Translocator.  
40 *Structure* **26**, 1284-1296 e1284 (2018).  
41 <https://doi.org/10.1016/j.str.2018.05.012>
- 42 47 Sun, L. *et al.* Crystal structure of a bacterial homologue of glucose transporters  
43 GLUT1-4. *Nature* **490**, 361-366 (2012). <https://doi.org/10.1038/nature11524>
- 44 48 Santos Seica, A. F. *et al.* Asp22 drives the protonation state of the  
45 *Staphylococcus epidermidis* glucose/H(+) symporter. *J Biol Chem* (2020).  
46 <https://doi.org/10.1074/jbc.RA120.014069>
- 47 49 Jia, R. *et al.* Hydrogen-deuterium exchange mass spectrometry captures distinct  
48 dynamics upon substrate and inhibitor binding to a transporter. *Nat Commun*  
49 **11**, 6162 (2020). <https://doi.org/10.1038/s41467-020-20032-3>

- 1 50 Madej, M. G., Sun, L., Yan, N. & Kaback, H. R. Functional architecture of MFS  
2 D-glucose transporters. *Proc Natl Acad Sci U S A* **111**, E719-727 (2014).  
3 <https://doi.org:10.1073/pnas.1400336111>
- 4 51 Suzek, B. E. *et al.* UniRef clusters: a comprehensive and scalable alternative for  
5 improving sequence similarity searches. *Bioinformatics* **31**, 926-932 (2015).  
6 <https://doi.org:10.1093/bioinformatics/btu739>
- 7 52 Altschul, S. F. *et al.* Gapped BLAST and PSI-BLAST: a new generation of  
8 protein database search programs. *Nucleic Acids Res* **25**, 3389-3402 (1997).  
9 <https://doi.org:10.1093/nar/25.17.3389>
- 10 53 Boyce, K., Sievers, F. & Higgins, D. G. Simple chained guide trees give high-  
11 quality protein multiple sequence alignments. *Proc Natl Acad Sci U S A* **111**,  
12 10556-10561 (2014). <https://doi.org:10.1073/pnas.1405628111>
- 13 54 Edgar, R. C. MUSCLE: a multiple sequence alignment method with reduced  
14 time and space complexity. *BMC Bioinformatics* **5**, 113 (2004).  
15 <https://doi.org:10.1186/1471-2105-5-113>
- 16 55 Kamisetty, H., Ovchinnikov, S. & Baker, D. Assessing the utility of  
17 coevolution-based residue-residue contact predictions in a sequence- and  
18 structure-rich era. *Proc Natl Acad Sci U S A* **110**, 15674-15679 (2013).  
19 <https://doi.org:10.1073/pnas.1314045110>
- 20 56 McInnes L, H. J., Saul N, Großberger L. UMAP: Uniform Manifold  
21 Approximation and Projection. *The Journal of Open Source Software* **3** (2018).  
22 <https://doi.org:10.21105/joss.00861>
- 23 57 S. Kullback, R. A. L. On Information and Sufficiency. *The Annals of*  
24 *Mathematical Statistics*. **22** (1951).
- 25 58 Hawkins, D. M. The problem of overfitting. *J Chem Inf Comput Sci* **44**, 1-12  
26 (2004). <https://doi.org:10.1021/ci0342472>
- 27 59 Alford, R. F., Fleming, P. J., Fleming, K. G. & Gray, J. J. Protein Structure  
28 Prediction and Design in a Biologically Realistic Implicit Membrane. *Biophys*  
29 *J* **118**, 2042-2055 (2020). <https://doi.org:10.1016/j.bpj.2020.03.006>
- 30 60 Bernsel, A., Viklund, H., Hennerdal, A. & Elofsson, A. TOPCONS: consensus  
31 prediction of membrane protein topology. *Nucleic Acids Res* **37**, W465-468  
32 (2009). <https://doi.org:10.1093/nar/gkp363>
- 33 61 Henikoff, S. & Henikoff, J. G. Amino acid substitution matrices from protein  
34 blocks. *Proc Natl Acad Sci U S A* **89**, 10915-10919 (1992).  
35 <https://doi.org:10.1073/pnas.89.22.10915>
- 36 62 M. J. Abraham, T. M., R. Schulz, S. Páll, J. C. Smith, B. Hess, and E. Lindahl.  
37 GROMACS: High performance molecular simulations through multi-level  
38 parallelism from laptops to supercomputers. *SoftwareX* **1-2**, 19-25 (2015).
- 39 63 Jo, S., Kim, T., Iyer, V. G. & Im, W. CHARMM-GUI: a web-based graphical  
40 user interface for CHARMM. *J Comput Chem* **29**, 1859-1865 (2008).  
41 <https://doi.org:10.1002/jcc.20945>
- 42 64 Huang, J. *et al.* CHARMM36m: an improved force field for folded and  
43 intrinsically disordered proteins. *Nat Methods* **14**, 71-73 (2017).  
44 <https://doi.org:10.1038/nmeth.4067>
- 45 65 Jorgensen W.L, C. J., Madura J.D. Comparison of simple potential functions for  
46 simulating liquid water. *The Journal of Chemical Physics* **79** (1983).  
47 <https://doi.org:https://doi.org/10.1063/1.445869>
- 48 66 S, N. A unified formulation of the constant temperature molecular dynamics  
49 methods. *The Journal of Chemical Physics* **81** (1984).  
50 <https://doi.org:https://doi.org/10.1063/1.447334>

- 1 67 Parrinello, M. Polymorphic transitions in single crystals: A new molecular  
2 dynamics method. *Journal of Applied Physics* **52** (1981).  
3 [https://doi.org:https://doi.org/10.1063/1.328693](https://doi.org/10.1063/1.328693)
- 4 68 Hess, B. P-LINCS: A parallel linear constraint solver for molecular simulation.  
5 *Journal of Chemical Theory and Computation* **4**, 116-122 (2008).
- 6 69 Darden, T. Y. D. P., L. Particle mesh Ewald: An  $N \cdot \log(N)$  method for Ewald  
7 sums in large systems. *The Journal of chemical physics* **98**, 10089-10092  
8 (1993).
- 9 70 Cortes C, V. V. Support-vector networks. *Machine Learning* **20**, 273–297  
10 (1995). [https://doi.org:10.1007/BF00994018](https://doi.org/10.1007/BF00994018)
- 11 71 Pearson, K. LIII. On lines and planes of closest fit to systems of points in space.  
12 *The Philosophical Magazine: A Journal of Theoretical Experimental and*  
13 *Applied Physics* **2**, 559-572 (2010).  
14 [https://doi.org:doi/abs/10.1080/14786440109462720](https://doi.org/doi/abs/10.1080/14786440109462720)  
15
